# Supplementary material
Source: Springer Nature journal article supplement (https://www.springermedizin.de/resource/supplementary/12911_2009_328_MOESM7_ESM.pdf/9525488)
Supplement: MOESM7 [file 9525488]

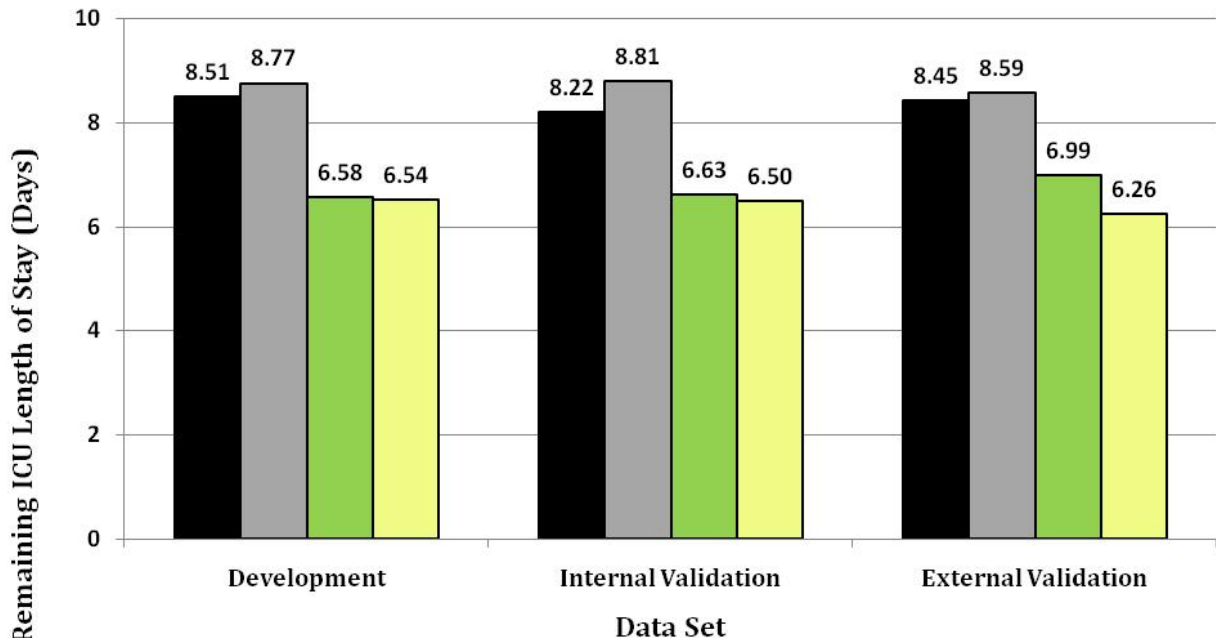

- Died: Observed ICU Stay
- Died: Predicted ICU Stay
- Alive: Observed ICU Stay
- Alive: Predicted ICU Stay
